# Supplementary material
Source: MDPI journal article supplement (https://www.mdpi.com/2075-163X/12/1/24)
Supplement: s1 [file s1]

**Table S1.** The CO<sub>2</sub>, CH<sub>4</sub> and N<sub>2</sub> (mol%) of aqueous-carbonic fluid measured by Raman spectroscopy analyses (50 analyses).

| mol%    | CO <sub>2</sub> | CH <sub>4</sub> | N <sub>2</sub> |
|---------|-----------------|-----------------|----------------|
| 3N1.1a  | 90              | 10              |                |
| 3N1.2b  | 100             |                 |                |
| 3N1.3a  | 90              | 10              |                |
| 3N1.3b  | 90              | 10              |                |
| 3N1.4b  | 100             |                 |                |
| 3N1.6a  |                 | 100             |                |
| 3N1.6b  |                 | 100             |                |
| 3N1.6d  |                 | 100             |                |
| 3N1.8b  | 99              | 1               |                |
| 3N1.8c  |                 | 100             |                |
| 3N1.10a | 100             |                 |                |
| 3N2.1c  | 90              | 10              |                |
| 3N2.1e  | 90              | 10              |                |
| 3N2.2a  | 91              | 9               |                |
| 3N2.2d  | 91              | 9               |                |
| 3N2.2e  | 90              | 10              |                |
| 3N2.3c  |                 | 100             |                |
| 3N2.3d  | 90              | 10              |                |
| 3N2.4d  | 100             |                 |                |
| 3N2.4f  | 90              | 10              |                |
| 3N2.4g  | 100             |                 |                |
| 3N2.5a  | 92              |                 | 8              |
| 3N2.5c  | 100             |                 |                |
| 3N2.5d  | 100             |                 |                |
| 3N2.6a  | 90              | 5               | 5              |
| 3N2.6b  | 88              | 9               | 3              |
| 3N2.7a  | 100             |                 |                |
| 3N2.7d  | 90              | 10              |                |
| 3N2.7e  | 90              | 10              |                |
| 3N2.7g  |                 | 100             |                |
| 3N2.9a  | 100             |                 |                |
| SHS1.3a | 99              | 1               |                |
| SHS1.3d | 100             |                 |                |
| SHS1.3l | 80              | 20              |                |
| SHS1.3p | 80              | 20              |                |
| SHS1.7  | 90              | 10              |                |
| SHS2.3a | 96              |                 | 4              |
| SHS2.3b | 95              |                 | 5              |
| SHS2.3c | 100             |                 |                |
| SHS2.3d |                 | 100             |                |
| SHS2.4c | 100             |                 |                |
| SHS2.5a | 92              |                 | 8              |
| SHS2.5b | 99              | 1               |                |
| SHS2.6a | 100             |                 |                |
| SHS2.6b | 100             |                 |                |
| SHS2.6c | 90              | 10              |                |
| SHS2.9a | 100             |                 |                |
| SHS2.9d | 99              | 1               |                |
| SHS2.9e | 99              | 1               |                |
